# Supplementary material
Source: publisher figshare collection journal article supplement (https://tandf.figshare.com/ndownloader/files/12289022)
Supplement: Supplementary file 1 [file 12289022]

Supplementary Table S1. Demographic information for the subsample who underwent MRI assessment

|  |  |  |  |
| --- | --- | --- | --- |
|  | ALL Group n=16 | TDC Group n=15 | *p* |
| Sex F (%) | 50.00 | 66.67 | 0.47a |
| Age at assessment, mean years (SD)  [range] | 11.67 (2.87)  [8.39-16.27] | 11.75 (2.54)  [8.15-15.68] | 0.93b |
| IQ, mean standard score (SD)  [range] | 101.81 (11.59)  [84.00-118.00] | 106.07 (10.35)  [91.00-130.00] | 0.29b |
| *Maternal education, n (%)* |  |  |  |
| Less than secondary school | 3 (18.75) | 0 (0.00) | 0.06c |
| Completed secondary school | 4 (25.00) | 2 (13.33) |  |
| Trade/Apprenticeship/Certificate/Diploma | 5 (31.25) | 6 (40.00) |  |
| Tertiary degree/Postgraduate degree | 4 (25.00) | 7 (46.67) |  |
| **Language spoken at home** |  |  |  |
| English | 14 (87.50) | 14 (93.33) | 0.99a |
| Handedness R (%) | 81.25 | 86.67 | 0.99a |
| **Treatment Details** |  |  |  |
| Age at diagnosis, mean years (SD)  [range] | 8.64 (3.12)  [4.96-13.74] | - |  |
| Time since diagnosis, mean years (SD)  [range] | 3.23 (0.55)  [2.40-3.64] |  |  |
| Time since treatment completion, mean months (SD)  [range] | 3.23 (0.55)  [2.72-4.56] | - |  |
| *Methotrexate, n (%)* |  |  |  |
| High dose methotrexate  Capizzi methotrexate | 8 (50.00)  8 (50.00) | - |  |
| *Steroid type, n (%)* |  |  |  |
| Dexamethasone | 8 (50.00) | - |  |
| Prednisone | 8 (50.00) | - |  |
| aFisher’s Exact Test, bt-test, cMann Whitney U; SD=standard deviation, F=female, n=number, R=right | | |  |
